# Supplementary material for: Human pre-valvular endocardial cells derived from pluripotent stem cells recapitulate cardiac pathophysiological valvulogenesis
Source: PubMed Central journal article supplement (PMC6486645; doi:10.1038/s41467-019-09459-5), 2019-04-26
Supplement: 41467_2019_9459_MOESM1_ESM.pdf [file 41467_2019_9459_MOESM1_ESM.pdf]

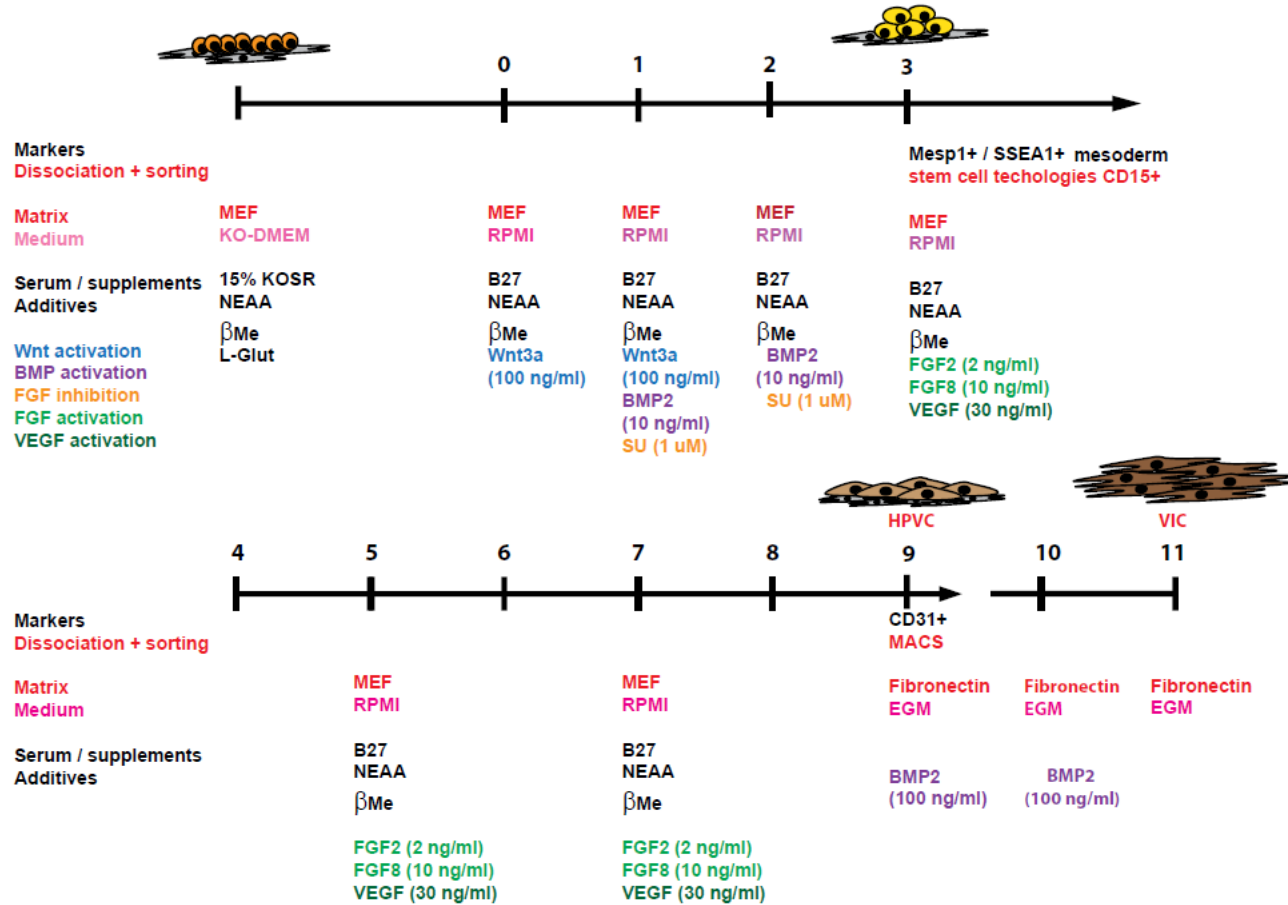

**Supplementary Figure 1: schema of valvular cell differentiation**

( $\beta$ Me: b-mercaptoethanol; NEAA: Non Essential Amino Acid; ECGM endothelial cell growth medium )

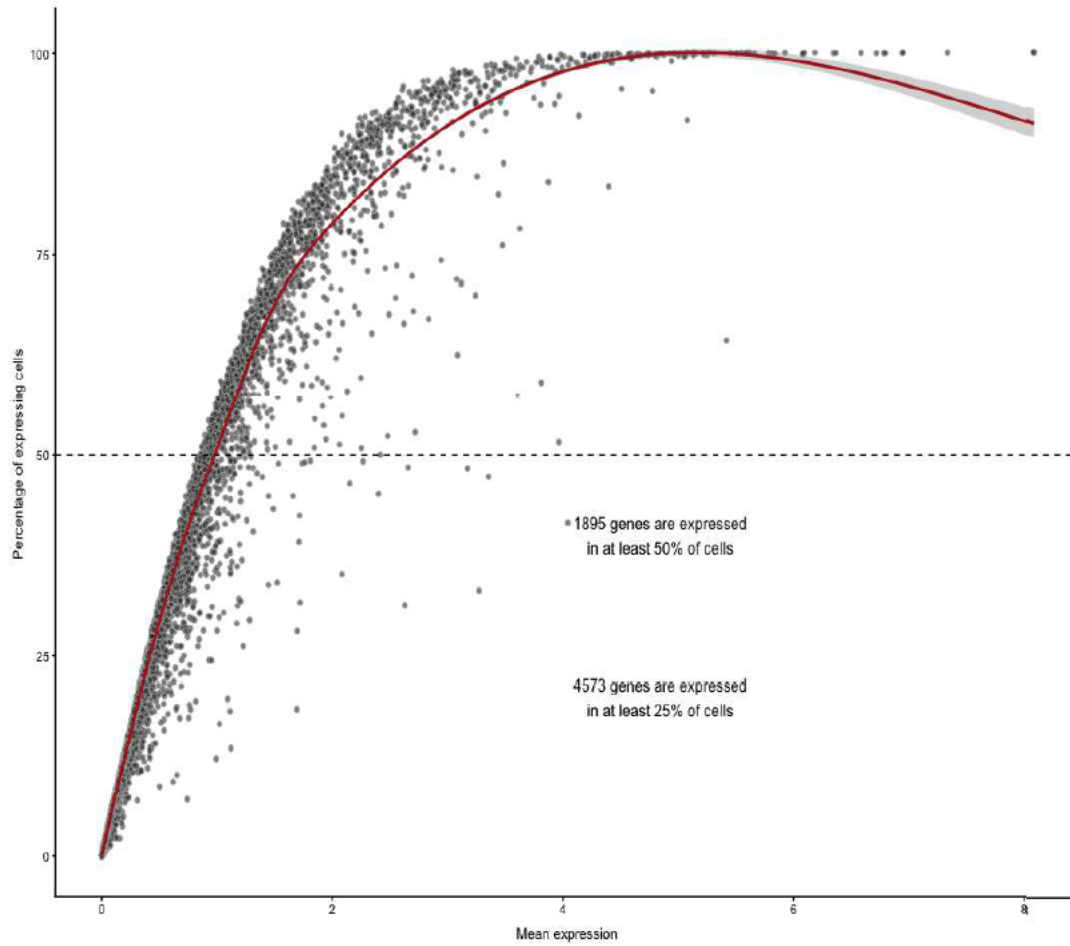

**Supplementary Figure 2: number and mean expression of genes in single cell datasets**

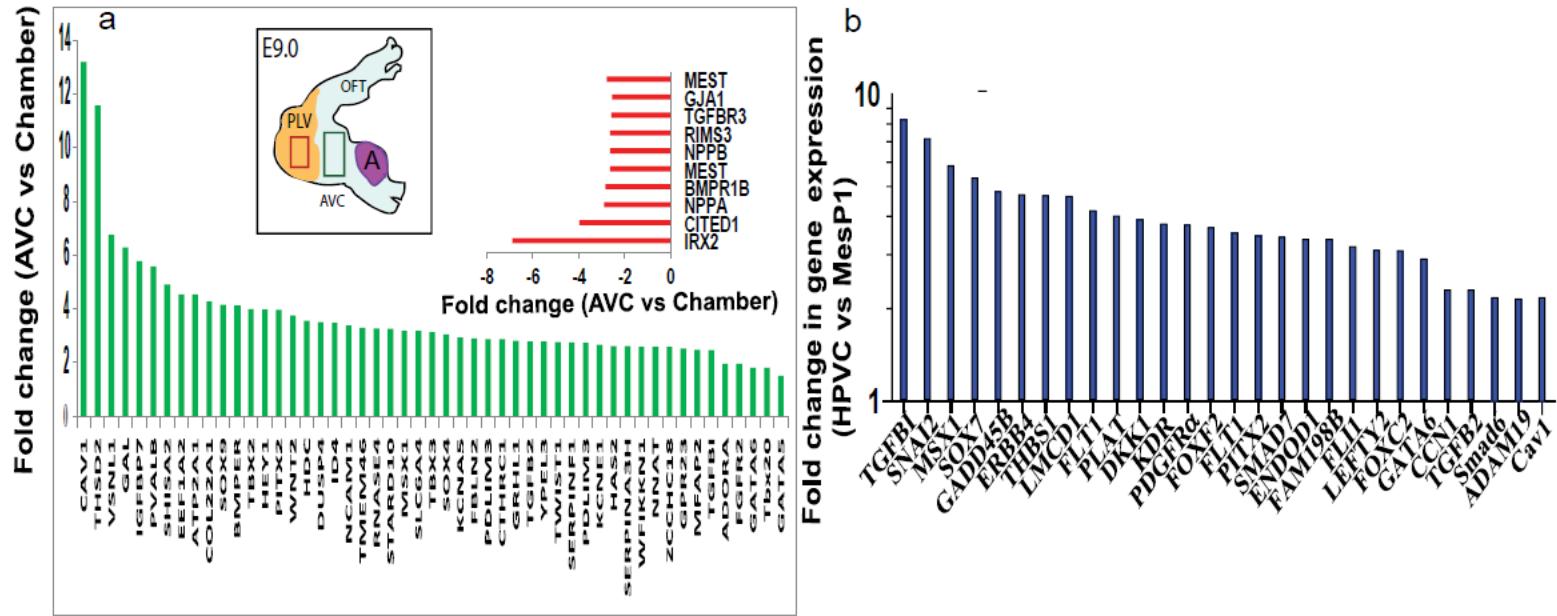

**Supplementary Figure 3: Gene expression profiles of embryonic AVC endocardium and human valve progenitors.**

(a) Mouse embryonic E9.0 AVCs and ventricles were dissected, RNA extracted and cRNAs used for microarrays.

The bargraph shows the most enriched genes in AVC endocardium ( green bars) and the less enriched (red bars in inset) versus the chambers.

(b) SSEA-1+-sorted human MESP1+ cells were seeded on MEFs and treated with 10 ng/ml FGF8 and 30 ng/ml VEGF for 6 days.

RNA was then collected and cDNAs of FGF8/VEGF treated cells (n=3 experiments) were used for microarrays and normalized versus MESP1+ cells from the same respective cell sorting (mean±SEM). Data are normalized to 1 as the level of gene expression in SSEA1+MESP1+ cells

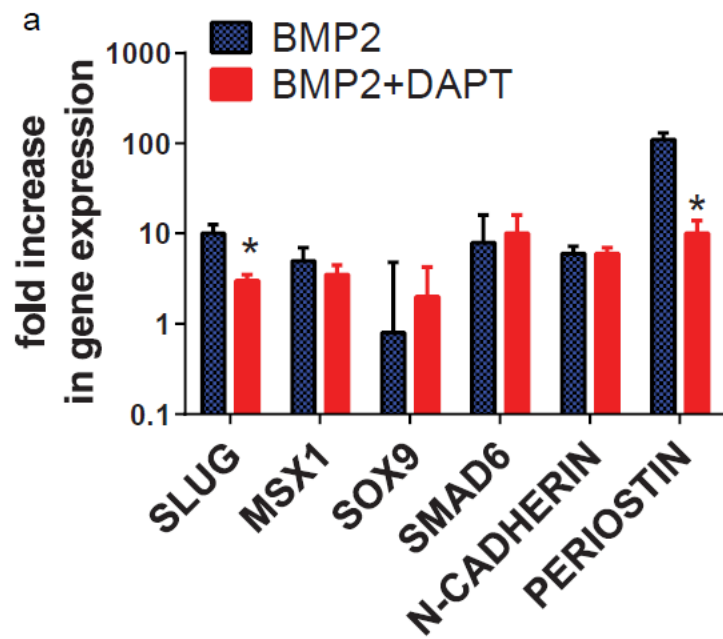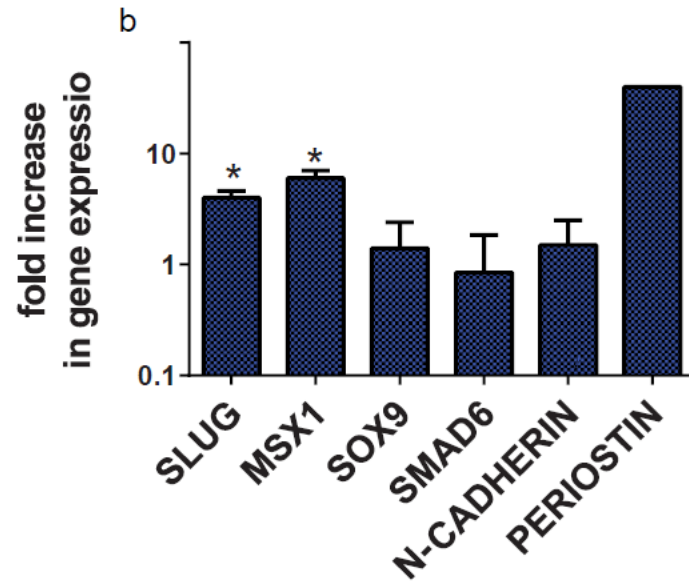

**Supplementary figure 4: EMT of HPVC cells is regulated by Notch.**

(a) After 1 week of FGF8/VEGF treatment on MEFs, valve progenitors (HPVCs) were recovered with trypsin, seeded on fibronectin coated wells and treated with 100 ng/ml BMP2 in the presence or absence of the notch inhibitor DAPT, while control cells were seeded on fibronectin and treated with VEGF to stop EMT. After 3-5 days, RNA was recovered and cDNAs were run in real-time PCR for post EMT markers. BMP2 samples are normalized on control (before treatment) samples, showing an increase in the expression of post-EMT markers (\*) significantly different  $p \leq 0.01$ ,  $n=5$ .

(b) Control FGF8/VEGF treated cells were transfected with NCDI, the notch intracellular domain, or empty backbone vector (mock), and gene expression was monitored three days later by real-time PCR and expressed as fold increase over the mock. (\*) significantly different  $p \leq 0.01$ ,  $n=7$  experiments

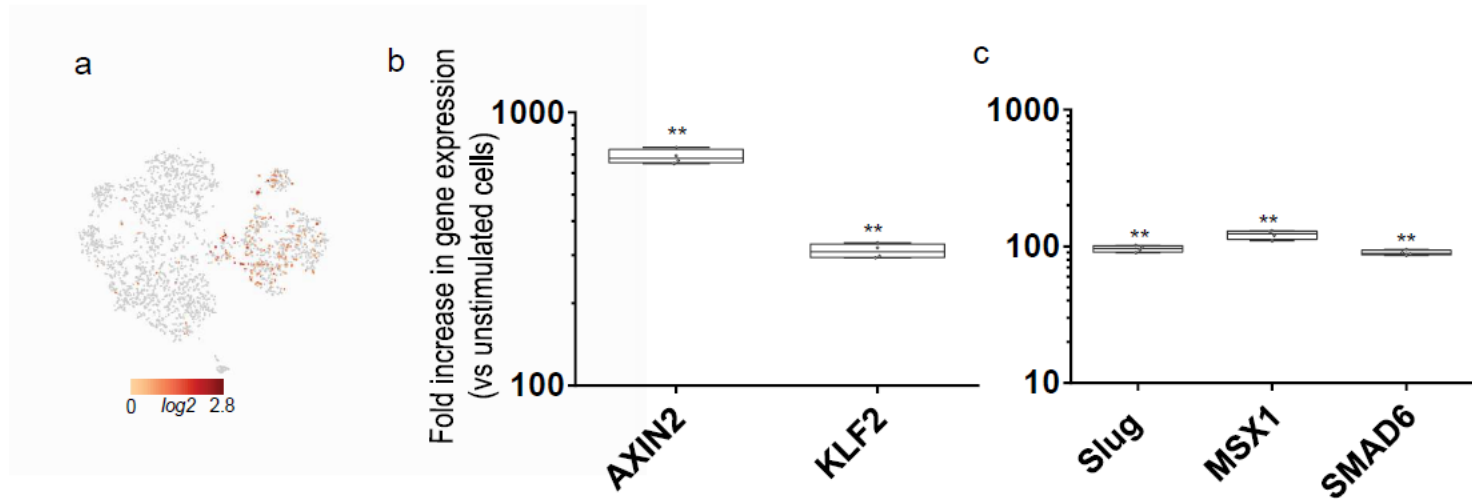

**Supplementary figure 5: Wnt activation of Klf2**

(a) single cell-sequencing of HPVCs: cluster of Klf2+ cells (b) wnt induced KLF2 and (c) EMT genes in HPVCs. Confluent CD31+-sorted HPVC were challenged for 24H with wnt3a and spondin3 and RNA extracted for RT-Q-PCR (2 experiments performed in duplicate, \*\* significantly different  $p \leq 0.01$ )

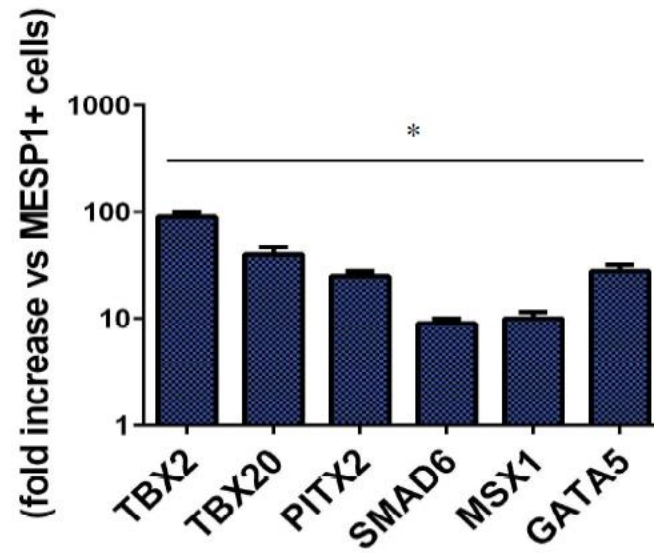

**Supplementary figure 6: Gene expression of iPS cells-derived HPVCs.**

Data are expressed as fold increase versus SSEA1+/MESP1+ sorted cells

(n=5, mean ± SEM; \* statistically significant  $p \leq 0.01$  from expression in SSEA1+/MESP1+ cells )

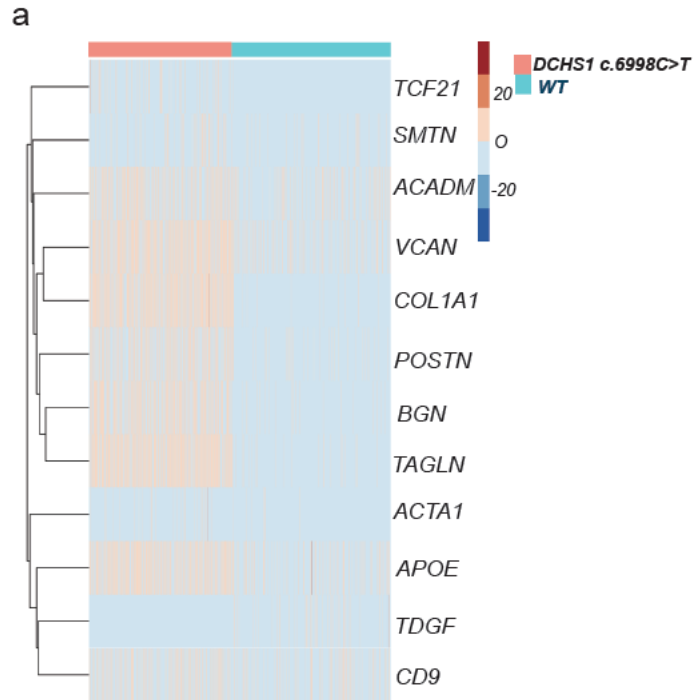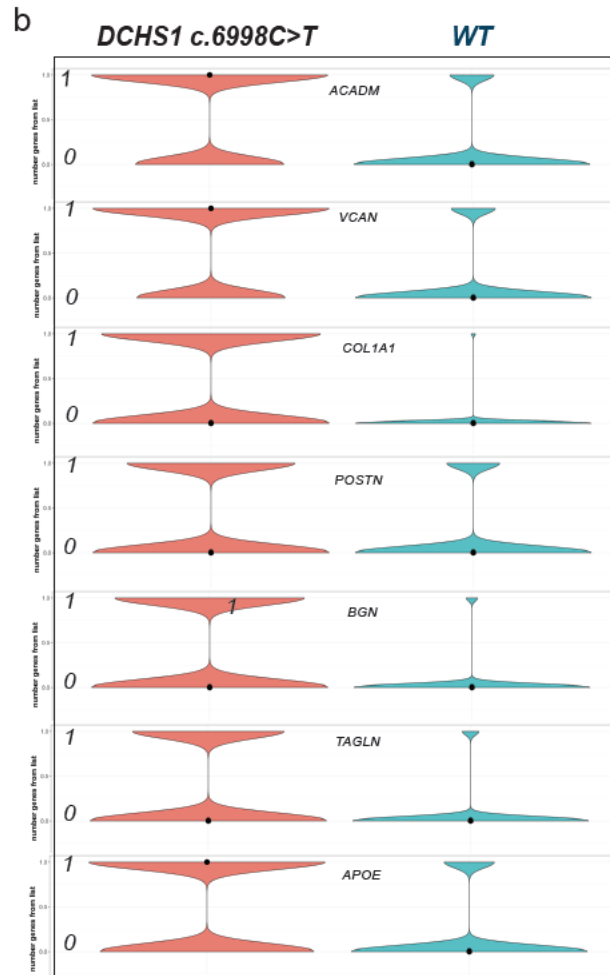

**Supplementary figure 7: Differential expression of genes between wt and DCCHS 1 mutated cells comparative heat map (a) and violin plots (b) between wt and DCCHS 1 mutated cells**

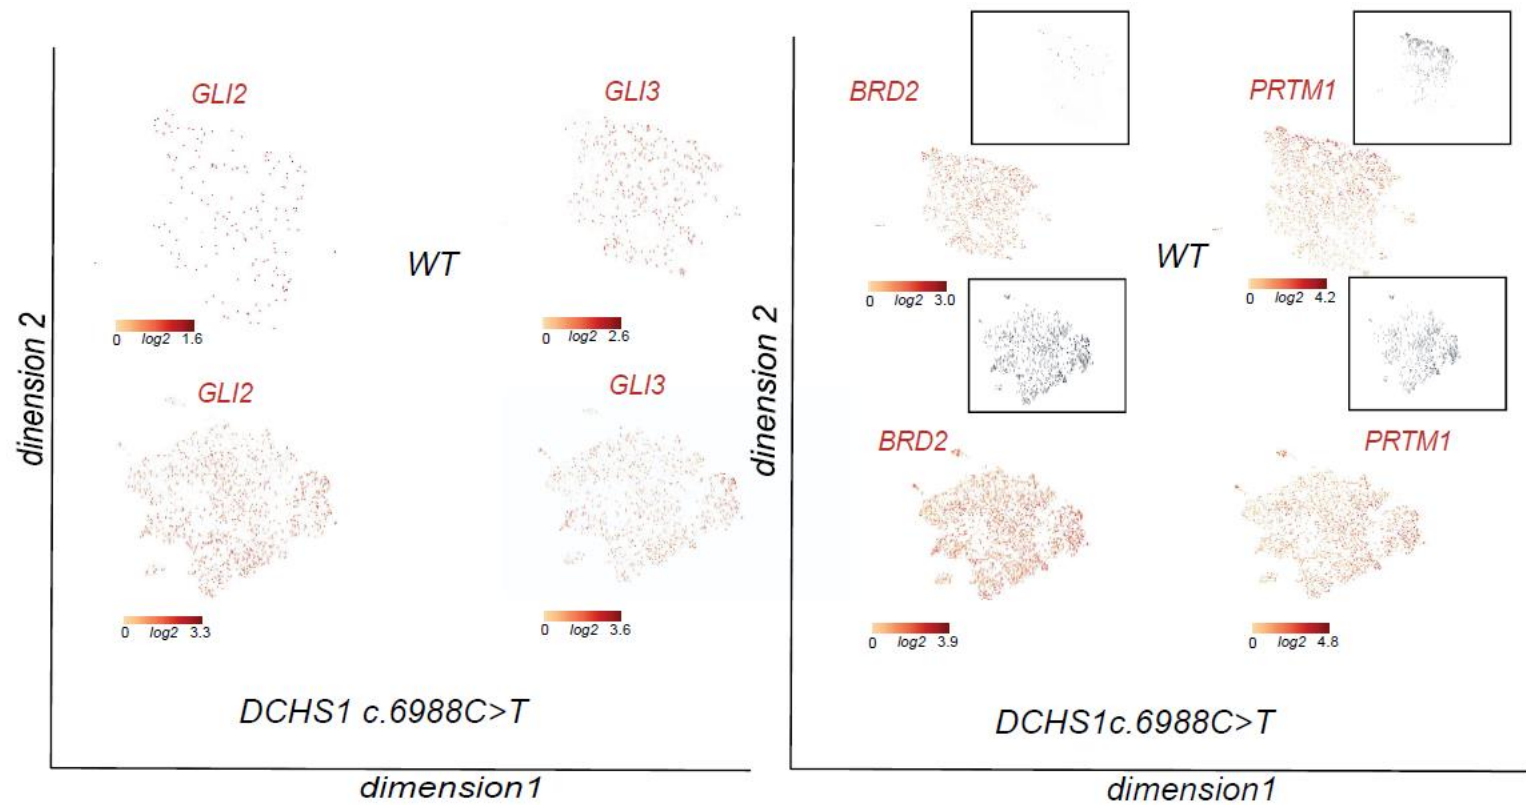

**Supplementary figure 8 : SHH pathway**

t-distributed stochastic neighbor embedding (t-SNE) 2D cell map 10X genomics (n=4316 cells) Highlight of cell populations expressing *GLI2* and *GLI3* (left panel) and *BRD2* and *PRTM1* (right panel) in both wt and *DCHS1 c.6988C>T* valvular cells . Insets show cells with high expression of *BRD2* and *PRTM1* (fold change log<sub>2</sub>>2).
